# Supplementary material for: Stable isotope tracing to assess tumor metabolism in vivo
Source: Springer Nature journal article supplement (doi:10.1038/s41596-021-00605-2), 2021-09-17
Supplement: MOESM2 [file 41596_2021_605_MOESM2_ESM17.xlsx]

## Sheet: Figure5A
	Time (minutes after bolus)
Patient	30	60	90	120	150	180
24		0.4286	0.4971	0.5142	0.4452	0.4384
28	0.4025	0.4318	0.4763	0.4629	0.4654
34		0.4833	0.4515	0.365	0.51
35		0.3365	0.5535	0.5559		0.5663
36		0.212	0.2871	0.3061	0.2961	0.2626
31			0.4494	0.4761	0.4896	0.5291
32	0.414	0.4692		0.4463
33	0.2528	0.4443	0.5026	0.51	0.5349	0.5452
38	0.2136	0.2505	0.2754	0.2972	0.2948	0.3271
39	0.4382	0.4957	0.5455	0.5456	0.6014
Plasma glucose enrichment during [U-13C]glucose infusion (Related to Figure 5A)
Note: Blood draws were rounded to the nearest 30 minute timepoint

## Sheet: Figure5B
	Patient
Time (min)	51	55	60	59	58	63	64	66	68	74	91	93	97	99	107	109	114	112	117	120	153	137	135	129	123
0	79	93	89	85	119	112	94	89	89	92	90	87	70	99	81	98	88	91	75	78	93	128	82	113	113
10		116	103	124	139	129	143	159	209	183			84	161	90	132		101	85		142	172	140
30																					109	142	99	115	151
60		113	79	88	133	135	132		109	107		84					110	102		85	122		95		135
90	113	111		91				137		74		113	79		82	128	117	116	84	90	119	126
120			93	134	103	118	170		156	105	121				120						124	150		149	141
150		111		155						103	124	108	128	142	110	123	160		123	117			108	188
180		115	108					79			118	144	123	161	134	118	157		134	117		134	95		159
Blood sugar levels (mg/dl) during [U-13C] glucose infusion in patients (Related to Figure 5B)
Note: Blood draws were rounded to the nearest 30 minute timepoint

## Sheet: Figure 6E
[U-13C]glucose infusions
	Mouse 1	Mouse 2	Mouse 3	Mouse 4	Mouse 5
	Control	Control	Control	GPT2 KO	GPT2 KO
Alanine	0.5879	0.5915	0.6001	0.7547	0.7332
Alanine m+1	0.0632	0.055	0.0691	0.0356	0.0424
Alanine m+2	0.0705	0.0565	0.0644	0.038	0.0457
Alanine m+3	0.2784	0.297	0.2664	0.1717	0.1787
Fractional enrichment of alanine in HCC15 xenografts (Related to Figure 6E)
